# Supplementary material for: Preparation of transparent and conductive thin films of metallic single-walled carbon nanotubes
Source: Royal Society of Chemistry journal article supplement (doi:10.1039/b803607a), 2008-01-01
Supplement: b803607a.pdf [file b803607a.pdf]

Supplementary information

## Preparation of transparent and conductive thin films of metallic single-walled carbon nanotubes

Yutaka Maeda, Masahiro Hashimoto, Shinya Kaneko, Makoto Kanda, Tadashi Hasegawa, Takahiro Tsuchiya, Takeshi Akasaka,\* Yasuhisa Naito, Tetsuo Shimizu, Hitoshi Tokumoto, Jing Lu, and Shigeru Nagase

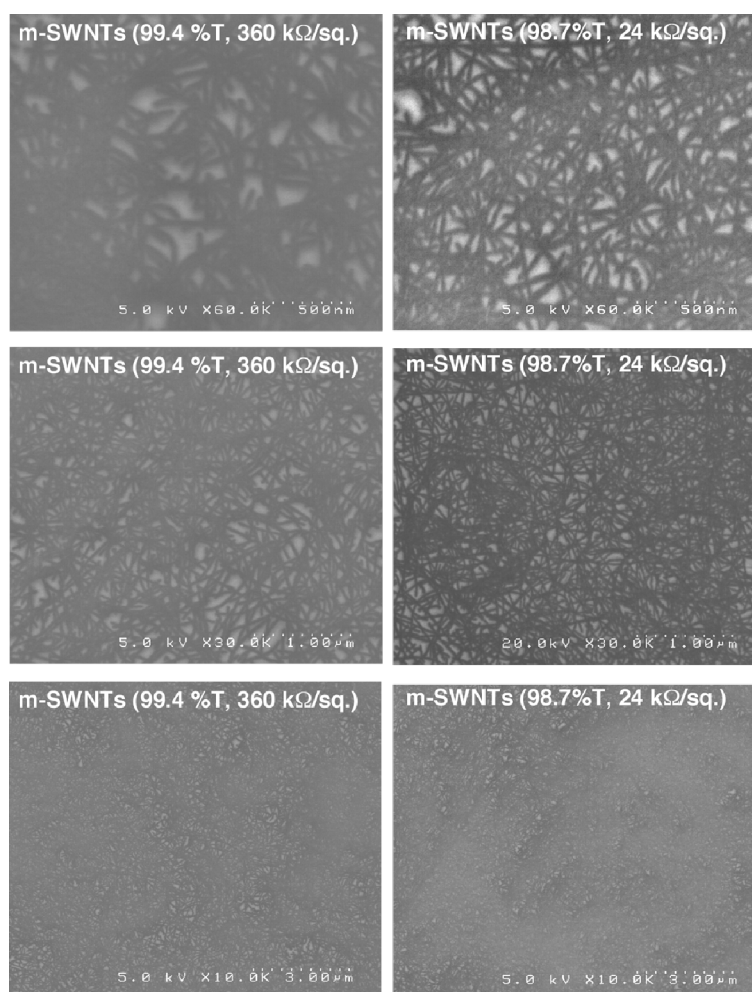

Figure S1. SEM images of m-SWNTs on a PET film.

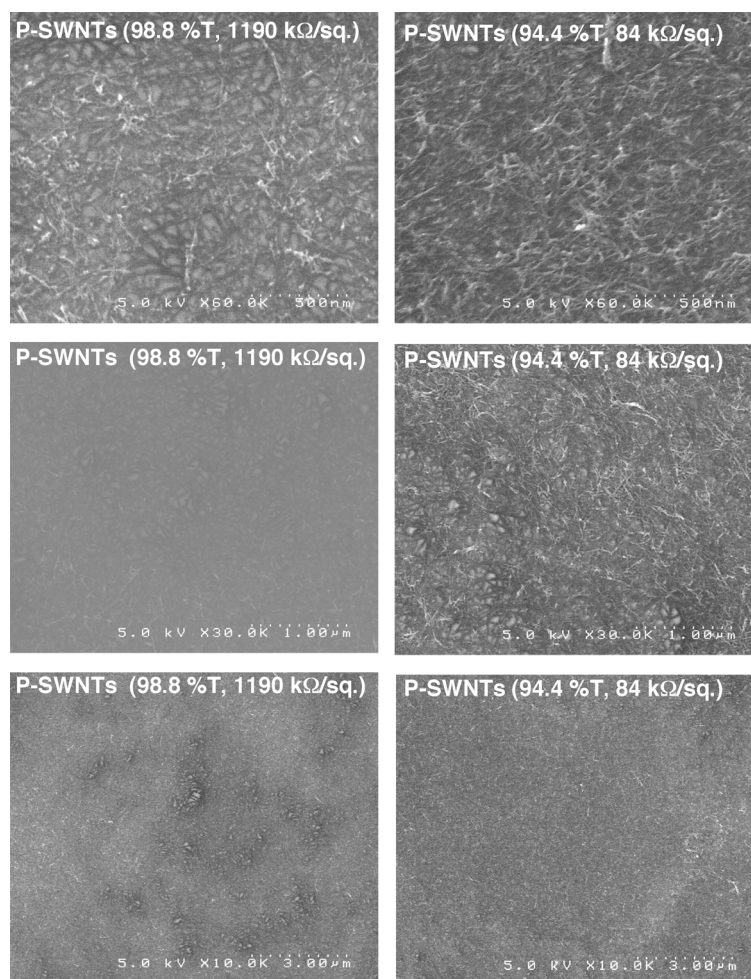

Figure S2. SEM images of P-SWNTs on a PET film.
